# Supplementary material
Source: Springer Nature journal article supplement (https://www.springermedizin.de/resource/supplementary/12874_2006_185_MOESM2_ESM.pdf/9433980)

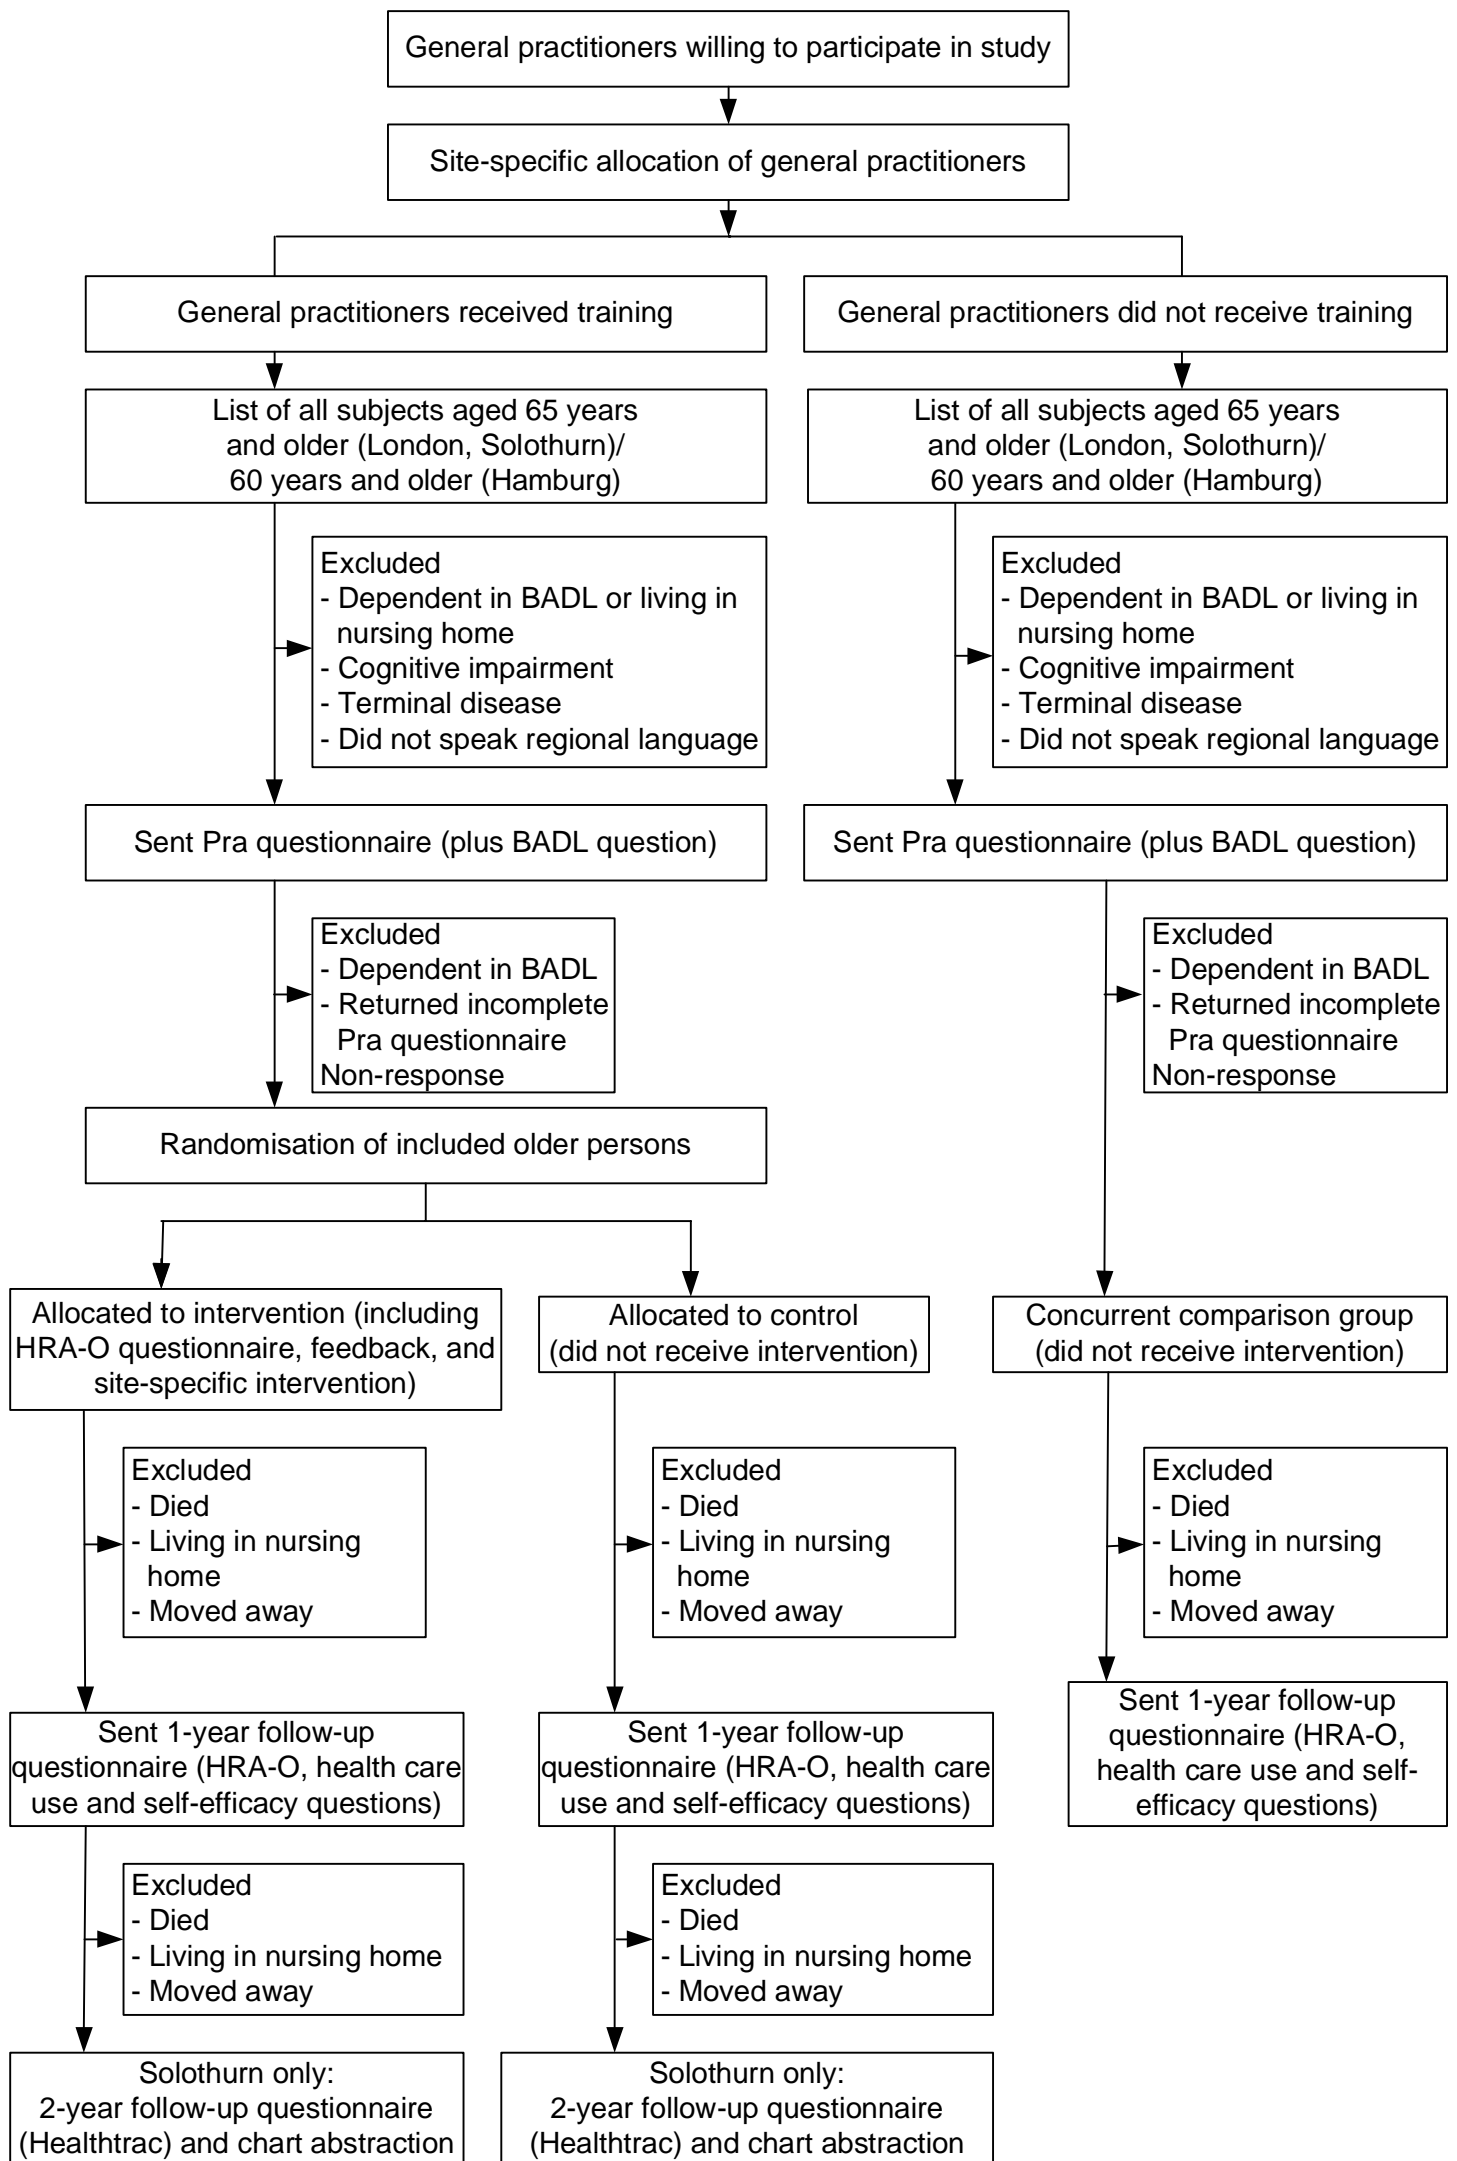

Supplement: MOESM2 [file 9433980]
